# Supplementary figures and images for: A mass spectrometry-based unique fragment approach for the identification of microcystins
Source: Royal Society of Chemistry journal article supplement (doi:10.1039/c4an01702a), 2014-12-19

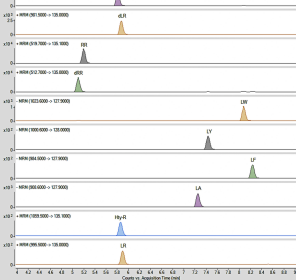

Supplement: c4an01702a1.pdf [file c4an01702a1.pdf]
